# Supplementary material for: Engineering of a kaolin/SLS-functionalized biochar@β-cyclodextrin composite for adsorption of o -nitrophenol; optimization, mechanistic study, and Box–Behnken design
Source: Royal Society of Chemistry journal article supplement (doi:10.1039/d5ra08005c), 2026-01-01
Supplement: d5ra08005c1.pdf [file d5ra08005c1.pdf]

**Engineering of Kaolin/SLS-Functionalized Biochar@ $\beta$ -cyclodextrin Composite for adsorbing o-Nitrophenol; Optimization, Mechanistic study, and Box–Behnken Design**

Abdelazeem S. Eltaweil <sup>1,2</sup>, Nouf Al Harby <sup>3,\*</sup>, Mervette El Batouti <sup>2</sup>, and Eman M. Abd El-Monaem <sup>4</sup>

<sup>1</sup> Department of engineering, College of Engineering and Technology, University of Technology and Applied Sciences, Ibra, Sultanate of Oman.

<sup>2</sup> Department of Chemistry, Faculty of Science, Alexandria University 21934, Alexandria, Egypt

<sup>3</sup> Department of Chemistry, College of Science, Qassim University, Buraidah 51452, Saudi Arabia.

<sup>4</sup> Advanced Technology Innovation, Borg El-Arab, Alexandria, Egypt.

\* Correspondence: N.F.A. ([hrbien@qu.edu.sa](mailto:hrbien@qu.edu.sa)).

**Figure S1.** EDX spectra of (a) pristine BC and the as-fabricated SLS-BC (b) before and (c) after washing.

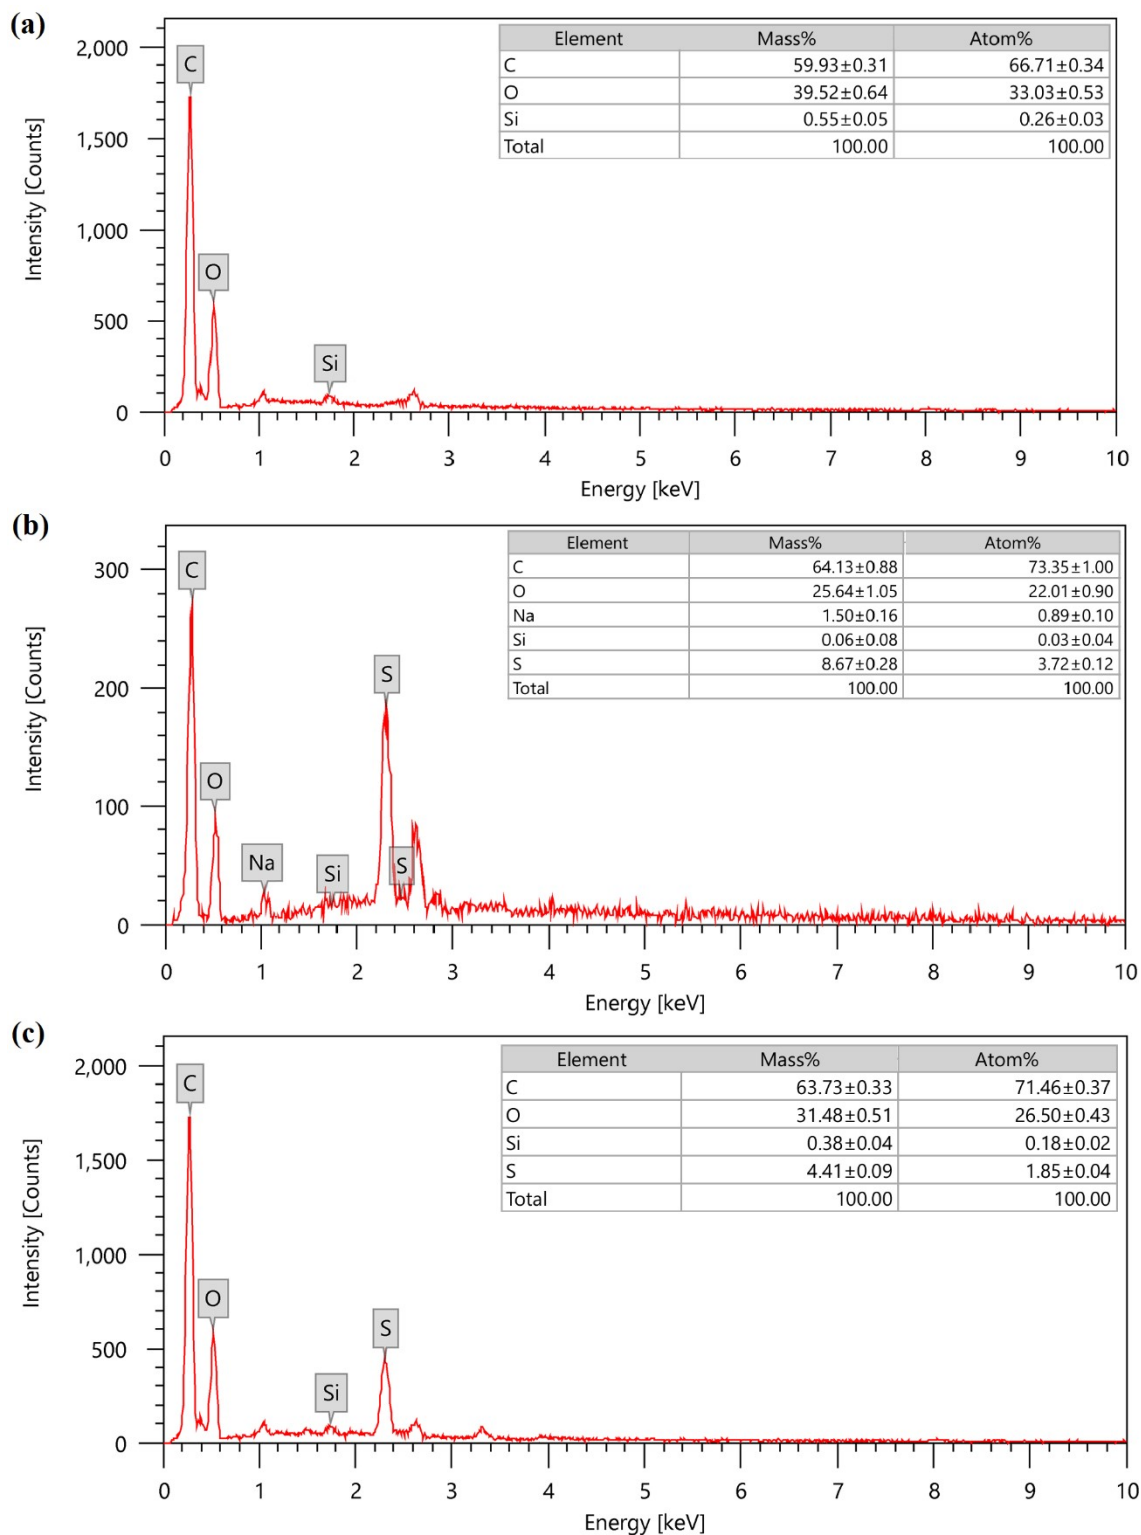

**Figure S2.** Removal% of different o-NP concentrations by Kaol/SLS-BC<sub>0.5</sub>/β-CD<sub>0.5</sub> composite.

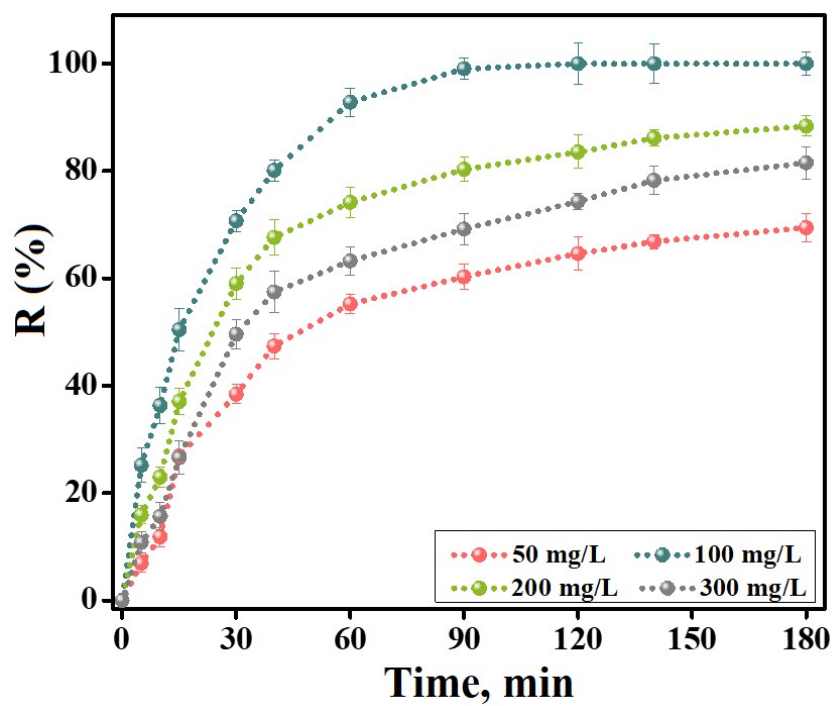

**Table S1.** Equations of the applied adsorption kinetic models

| Kinetic Model       | Equation                                                                      |
|---------------------|-------------------------------------------------------------------------------|
| Pseudo–First order  | $\ln (q_e - q_t) = \ln q_e - \left(\frac{k_1}{2.303}\right)t \quad (1)$       |
| Pseudo–Second order | $t/q_t = 1/k_2 q_e^2 + 1/q_e(t) \quad (2)$                                    |
| Elovich model       | $q_t = \frac{1}{\beta} \ln (\alpha\beta) + \frac{1}{\beta} \ln (t) \quad (3)$ |

Where,  $q_t$  and  $q_e$  are amounts of adsorbed o-NP at time  $t$  and equilibrium, respectively.  $k_1$  and  $k_2$  are the rate constants of Pseudo first order and Pseudo second order, respectively.  $\alpha$  and  $\beta$  are Elovich coefficients that represent the initial adsorption rate and the desorption coefficient, respectively, also related to the extent of surface coverage and activation energy for chemisorption.

**Table S2:** Equations of the applied adsorption isotherm models

| Model             | Equation                                                                                                             |
|-------------------|----------------------------------------------------------------------------------------------------------------------|
| <b>Langmuir</b>   | $\frac{C_e}{q_e} = \frac{1}{K_L q_{max}} + \frac{C_e}{q_{max}} \quad (4)$                                            |
| <b>Freundlich</b> | $\ln q_e = \ln K_f + \frac{1}{n} \ln C_e \quad (5)$                                                                  |
| <b>Temkin</b>     | $q_e = B \ln K_T + B \ln C_e \quad (6)$                                                                              |
| <b>DR</b>         | $\ln q_e = \ln q_s - K_{DR} \varepsilon^2, \quad \varepsilon = RT \ln \left( 1 + \frac{1}{C_e} \right) \quad (7, 8)$ |

Where,  $q_e$  and  $C_e$  are the adsorption capacity and the concentration of the un-adsorbed o-NP at equilibrium, respectively.  $q_{max}$  and  $K_L$  are the monolayer adsorption capacity and Langmuir constant, respectively.  $n$  and  $K_f$  are Freundlich constants.  $K_T$  is the equilibrium binding constant and  $B = \frac{RT}{b}$ ,  $b$  is Temkin constant related to heat of adsorption.  $R$  is the gas constant (8.314 J/mol.k) and  $T$  is the absolute temperature.  $Q_s$  is the saturation capacity,  $\varepsilon$  is the Polanyi potential and  $K_{DR}$  is a constant related to the mean free energy of adsorption per mole of the adsorbate.

**Table S3:** Elemental composition of the pure and recyclable of Kaol/SLS-BC<sub>0.5</sub>/β-CD<sub>0.5</sub> composite.

| Elements | Atomic % of pure composite | Atomic % of recyclable composite |
|----------|----------------------------|----------------------------------|
| Si       | 13.15                      | 12.86                            |
| Al       | 11.87                      | 11.15                            |
| C        | 19.45                      | 18.93                            |
| S        | 3.31                       | 3.27                             |
| O        | 52.22                      | 52.78                            |
| N        | —                          | 1.01                             |
